# Supplementary material for: P-Selectin Glycoprotein Ligand-1 Deficiency Is Protective Against Obesity-Related Insulin Resistance
Source: PubMed Central journal article supplement — Diabetes. 2010 Oct 22;60(1):189–99. doi: 10.2337/db09-1894 (PMC3012171; doi:10.2337/db09-1894), 2010-10-22

## ONLINE APPENDIX – Supplemental Data

### **P-selectin glycoprotein ligand-1 deficiency is protective against obesity-related insulin resistance**

Chikage Sato<sup>1,2</sup>, Kenichi Shikata<sup>1,3</sup>, Daisho Hirota<sup>1</sup>, Motofumi Sasaki<sup>1</sup>, Shingo Nishishita<sup>1</sup>, Satoshi Miyamoto<sup>1</sup>, Ryo Kodera<sup>1</sup>, Daisuke Ogawa<sup>1,2</sup>, Nobuo Kajitani<sup>1</sup>, and Hirofumi Makino<sup>1</sup>

<sup>1</sup>Department of Medicine and Clinical Science, Okayama University Graduate School of Medicine, Dentistry and Pharmaceutical Sciences, Okayama, 700-8558, Japan

<sup>2</sup>Department of diabetic nephropathy, Okayama University Graduate School of Medicine, Dentistry and Pharmaceutical Science, Okayama, 700-8558, Japan

<sup>3</sup>Center for Innovative Clinical Medicine, Okayama University Hospital, Okayama, 700-8558, Japan

**Supplementary Figure 1.** DNA microarray analysis. Gene ontology biological process classification of more than twice upregulated genes db/db versus wild type mice. (total; 1080 genes)

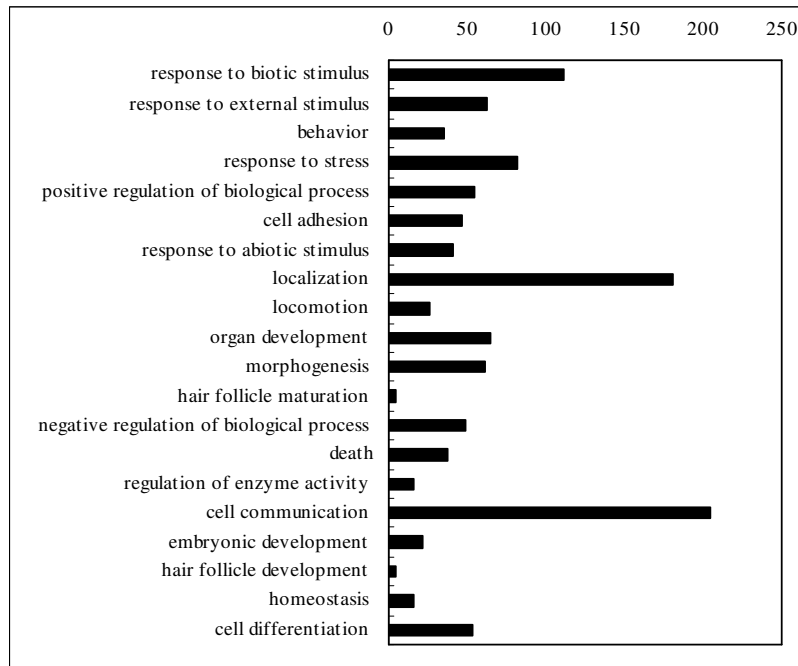

**Supplementary Figure 2.** DNA microarray analysis. Gene ontology biological process classification of more than twice upregulated genes HFD versus LFD. (total; 572 genes)

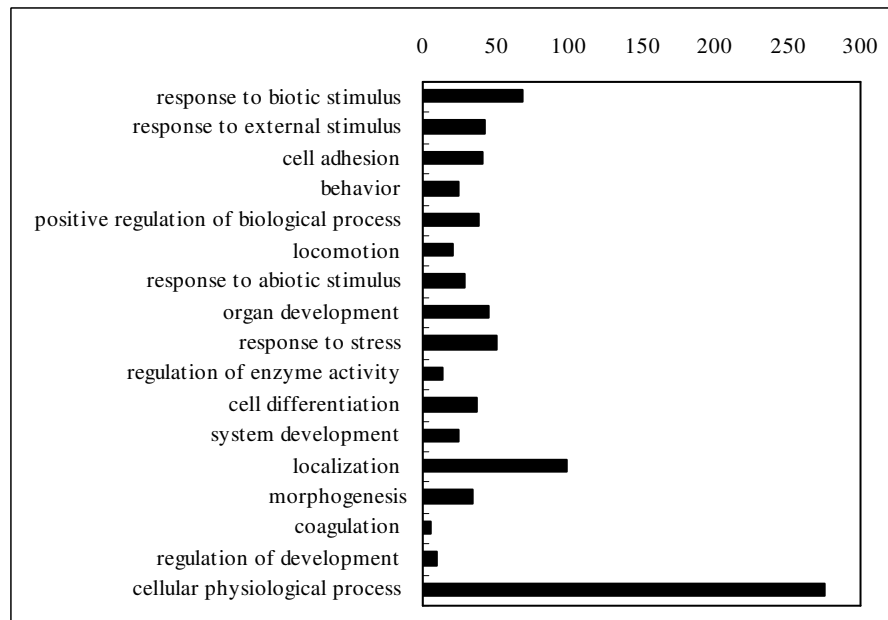

Supplement: supp_db09-1894_db091894onlineappendix.pdf [file supp_db09-1894_db091894onlineappendix.pdf]
